# Supplementary material for: Mechanical tough and multicolor aggregation-induced emissive polymeric hydrogels for fluorescent patterning
Source: Royal Society of Chemistry journal article supplement (doi:10.1039/d2na00757f), 2022-12-14
Supplement: d2na00757f1.pdf [file d2na00757f1.pdf]

## Supporting Information

### **Mechanical Tough, Multicolor Aggregation-Induced Emissive Polymeric Hydrogels for Fluorescent Patterning**

Yi Zhang<sup>ab</sup>, Ruijia Wang<sup>b</sup>, Wei Lu<sup>b\*</sup>, Wanning Li<sup>b</sup>, Si Chen<sup>a\*</sup>, Tao  
Chen<sup>b\*</sup>

<sup>a</sup> College of Material Science and Engineering, Zhejiang University of Technology,  
Hangzhou 310014, Zhejiang, China

<sup>b</sup> Key Laboratory of Marine Materials and Related Technologies, Zhejiang Key  
Laboratory of Marine Materials and Protective Technologies, Ningbo Institute of  
Materials Technology and Engineering, Chinese Academy of Sciences, Ningbo  
315201, China

E-mail: chensi@zjut.edu.cn, luwei@nimte.ac.cn, tao.chen@nimte.ac.cn

**The PDF file includes:**

|                                                                                              |     |
|----------------------------------------------------------------------------------------------|-----|
| <b>Figure S1.</b> FT-IR spectra of MP-NI.....                                                | S-1 |
| <b>Figure S2.</b> UV-Vis spectru MP-NI (0.1 mg/ml in THF).....                               | S-1 |
| <b>Figure S3.</b> Synthetic procedure of the linear AIE-active PMA polymer.....              | S-2 |
| <b>Figure S4.</b> TLC analysis results of the purified PMA polymer.....                      | S-2 |
| <b>Figure S5.</b> Fabrication of Eu-Alg/ PMA and Tb-Alg/ PMA gels.....                       | S-3 |
| <b>Figure S6.</b> SEM images of the freeze-dried Eu-Alg/PMA and Tb-Alg/PMA hydrogel.....     | S-3 |
| <b>Figure S7.</b> High-resolution XPS fitting results for Tb4d.....                          | S-4 |
| <b>Figure S8.</b> Fluorescence spectra of Eu-Alg/PMA hydrogels.....                          | S-4 |
| <b>Figure S9</b> UV-Vis spectra Eu/ Tb/ Ca-Alg/PMA hydrogels.....                            | S-5 |
| <b>Figure S10.</b> Fabrication of multicolor fluorescent patterns on the Ca-Alg/PMA gel..... | S-5 |
| <b>References</b> .....                                                                      | S-6 |

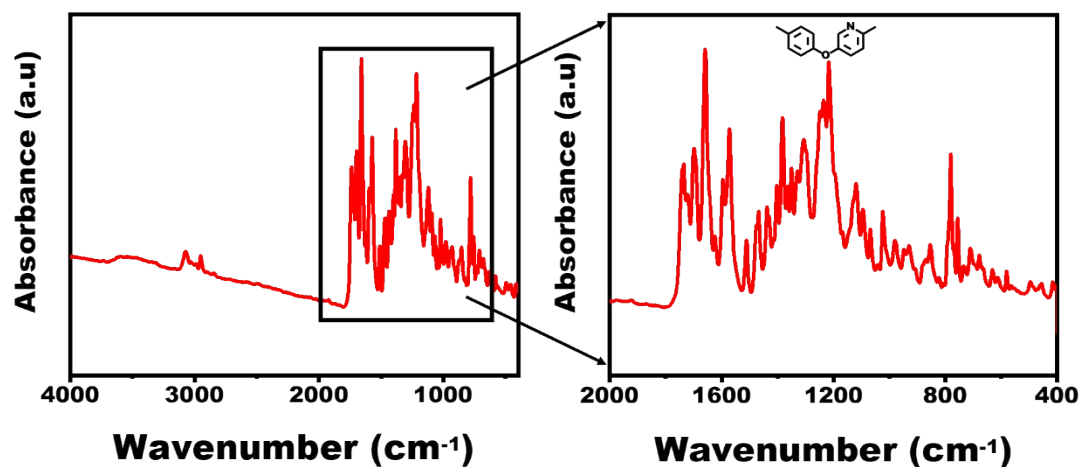

Figure S1. FT-IR spectra of MP-NI.

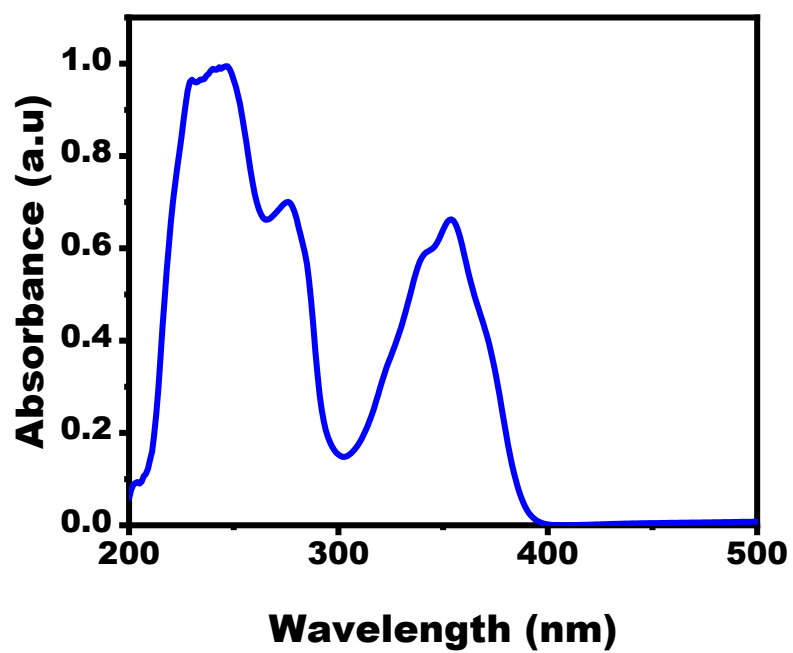

Figure S2. UV-Vis spectrum of MP-NI (0.1 mg/ml in THF).

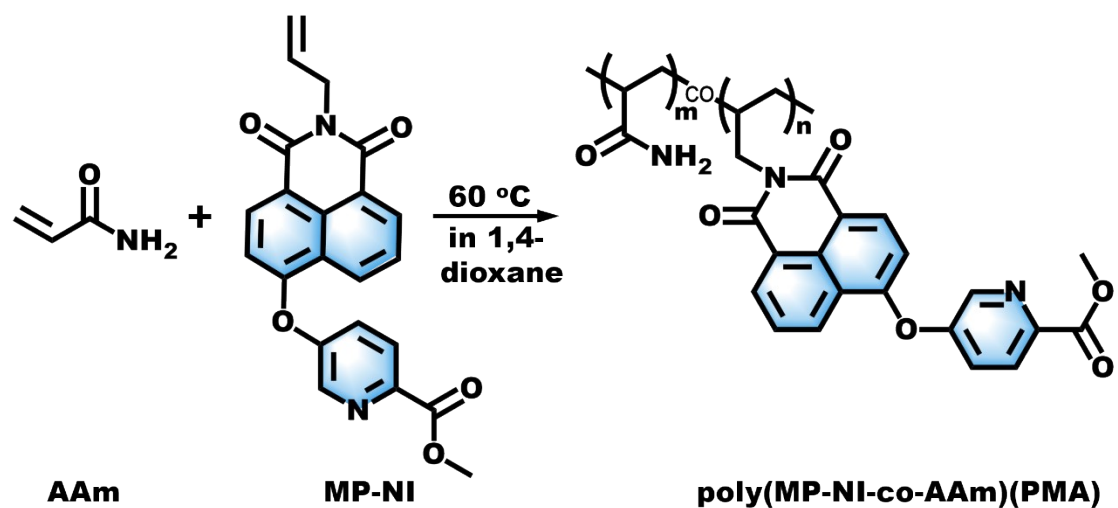

**Figure S3.** Synthetic procedure of the linear AIE-active PMA polymer.

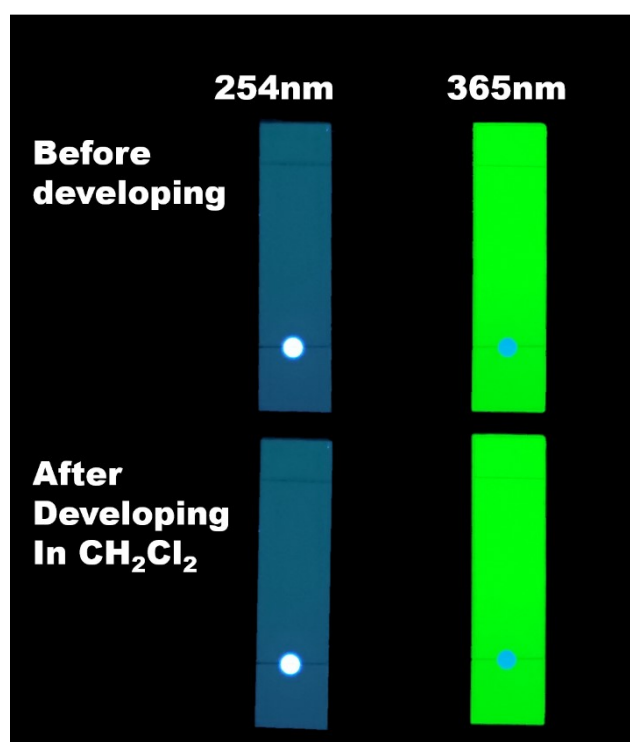

**Figure S4.** TLC analysis results of the purified PMA polymer by using  $\text{CH}_2\text{Cl}_2$  as the eluents.  $\text{CH}_2\text{Cl}_2$  is a good solvent for MP-NI, but poor solvent for the PMA polymer. These TLC results indicated there was no MP-NI residue in the purified PMA polymer.

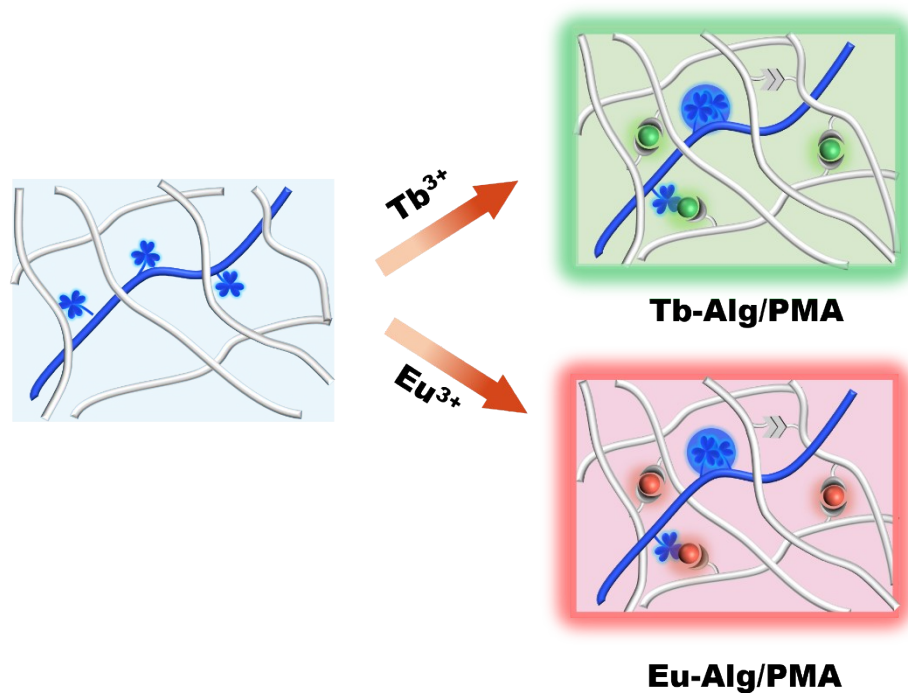

**Figure S5.** Scheme showing the preparation of dually cross-linked Tb-Alg/PMA and Eu-Alg/PMA hydrogels with lanthanide coordination and hydrogen bonding crosslinks.

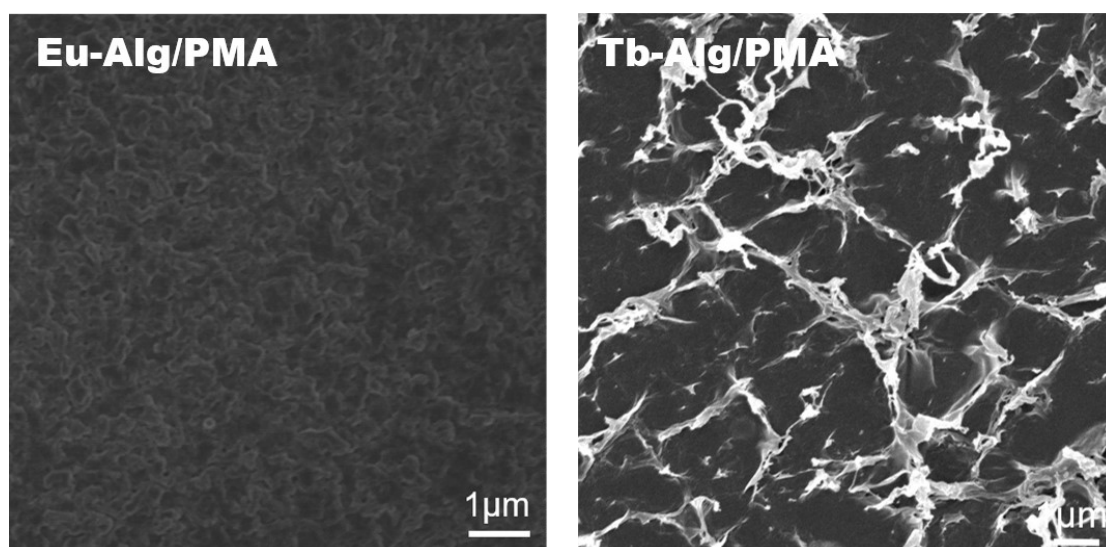

**Figure S6.** SEM images of the freeze-dried Eu-Alg/PMA and Tb-Alg/PMA hydrogels.

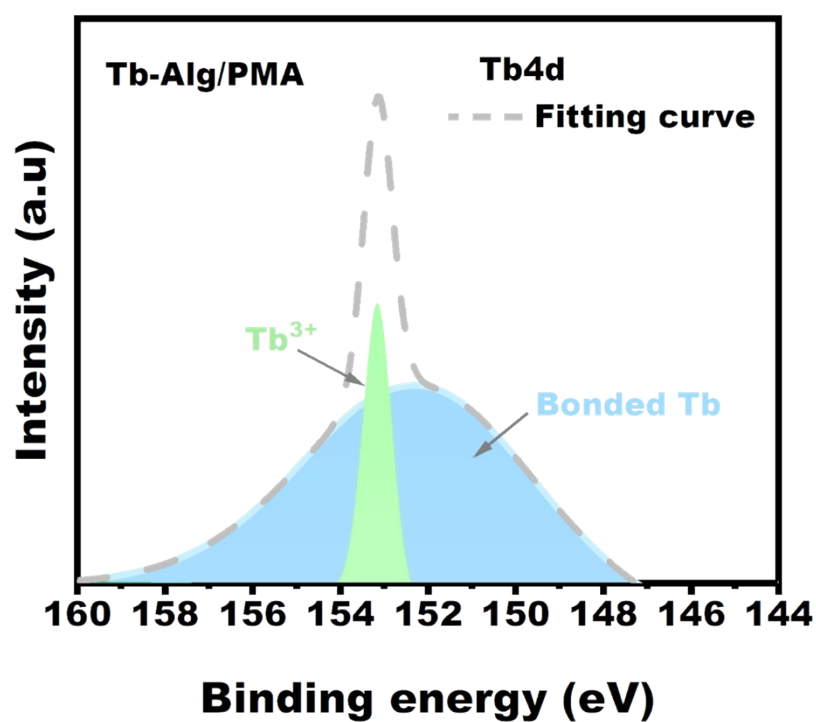

**Figure S7.** High-resolution XPS fitting results for Tb<sub>4d</sub> of Tb-Alg/PMA hydrogel sample.

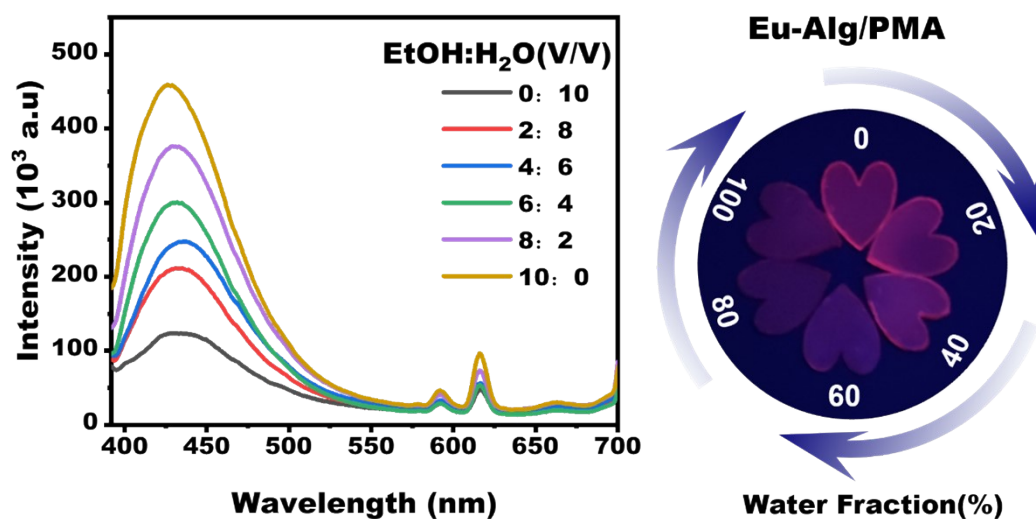

**Figure S8.** The recorded fluorescence spectra of the Eu-Alg/PMA gel samples that were prepared by treating the as-prepared Eu-Alg/PMA hydrogels in mixed EtOH/H<sub>2</sub>O for solvent exchange, and their corresponding photos taken under 365 nm UV light.

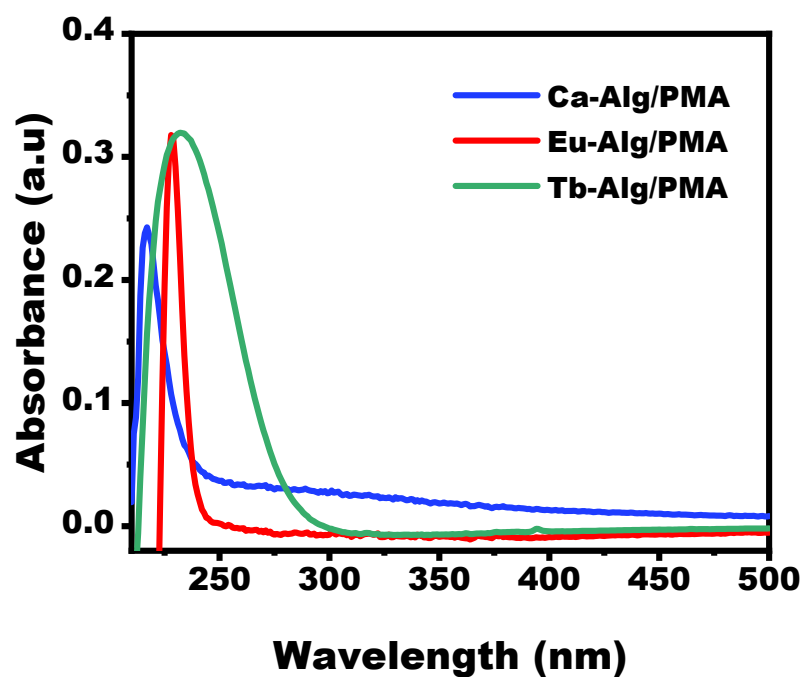

Figure S9 UV-Vis spectra Eu-Alg/PMA, Tb-Alg/PMA and Ca-Alg/PMA hydrogels.

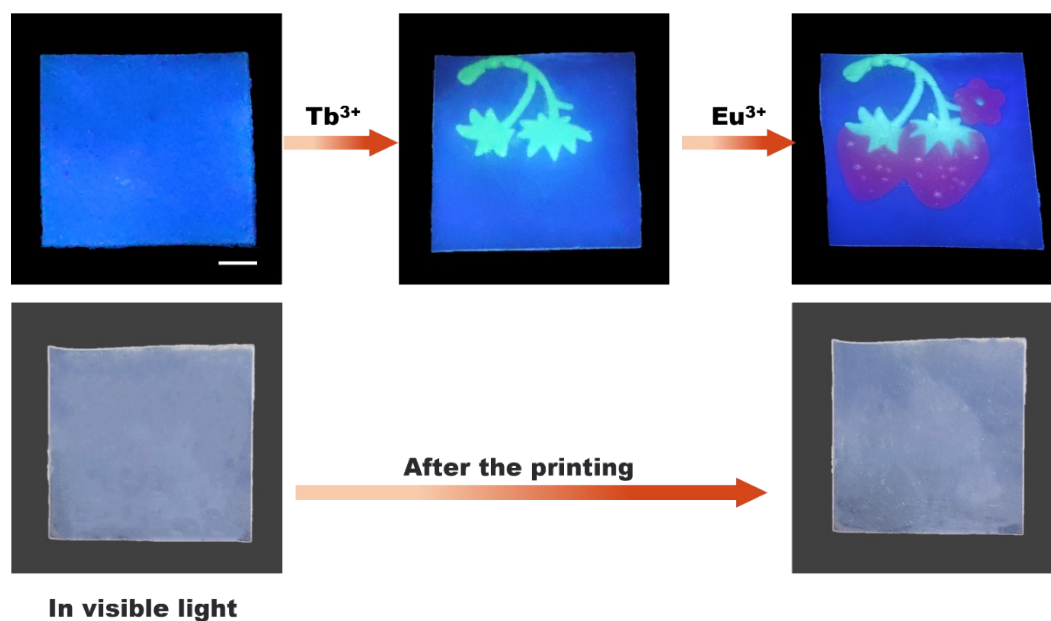

Figure S10. Fabrication of multicolor fluorescent patterns on the Ca-Alg/PMA hydrogel sheet by using  $Tb^{3+}$  and  $Eu^{3+}$  ions as the inks. In the bottom two photos taken under daylight, no patterns were observed, suggesting their potential uses for information encryption.

## References

1. Li, P.; Zhang, D.; Zhang, Y.; Lu, W.; Zhang, J.; Wang, W.; He, Q.; Theato, P.; Chen, T., Aggregation-Caused Quenching-Type Naphthalimide Fluorophores Grafted and Ionized in a 3D Polymeric Hydrogel Network for Highly Fluorescent and Locally Tunable Emission. *ACS Macro Lett.* 2019, **8**, 937-942.
